1 GDV1 C-terminal truncation of 39 amino acids disrupts sexual commitment in  
2 *Plasmodium falciparum*.

3

4 Marta Tibúrcio<sup>1</sup>, Eva Hitz<sup>2,3</sup>, Igor Niederwieser<sup>2,3</sup>, Gavin Kelly<sup>4</sup>, Heledd Davies<sup>1</sup>,  
5 Christian Doerig<sup>5</sup>, Oliver Billker<sup>6,7</sup>, Till S. Voss<sup>2,3</sup>, Moritz Treeck<sup>1\*</sup>

6

7 <sup>1</sup>Signalling in Apicomplexan Parasites Laboratory, The Francis Crick Institute, 1 Midland  
8 Road NW1 1AT London, United Kingdom

9 <sup>2</sup>Department of Medical Parasitology and Infection Biology, Swiss Tropical and Public Health  
10 Institute, 4051 Basel, Switzerland

11 <sup>3</sup>University of Basel, 4003 Basel, Switzerland

12 <sup>4</sup>Bioinformatics Science Technology Platform, The Francis Crick Institute, 1 Midland Road  
13 NW1 1AT London, United Kingdom

14 <sup>5</sup>Centre for Chronic Infectious and Inflammation Disease, Biomedical Sciences Cluster, School  
15 of Health and Biomedical Sciences, RMIT University, Bundoora VIC 3083, Australia

16 <sup>6</sup>Billker Group, Rodent Models of Malaria, Wellcome Sanger Institute, Wellcome Genome  
17 Campus, Hinxton, CB10 1SA Cambridge, United Kingdom

18 <sup>7</sup>Department of Molecular Biology and Molecular Infection Medicine Sweden, Umeå, Sweden

19

20

21

22 \*Corresponding Author: Moritz Treeck, PhD

23 Tel: +44 (0)20 37962345

24 email: Moritz.Treeck@crick.ac.uk

25

26

## 27 **Abstract**

28 Malaria is a mosquito-borne disease caused by apicomplexan parasites of the genus  
29 *Plasmodium*. Completion of the parasite's life cycle depends on the transmission of  
30 sexual stages, the gametocytes, from an infected human host to the mosquito vector.  
31 Sexual commitment occurs in only a small fraction of asexual blood stage parasites  
32 and is initiated by external cues. The gametocyte development protein 1 (GDV1) has  
33 been described as a key facilitator to trigger sexual commitment. GDV1 interacts with  
34 the silencing factor heterochromatin protein 1 (HP1), leading to its dissociation from  
35 heterochromatic DNA at the genomic locus encoding AP2-G, the master transcription  
36 factor of gametocytogenesis. How this process is regulated is not known. In this study  
37 we have addressed the role of protein kinases implicated in gametocyte  
38 development. From a pool of available protein kinase KO lines, we identified two  
39 kinase knockout lines which fail to produce gametocytes. However, independent  
40 genetic verification revealed that both kinases are not required for  
41 gametocytogenesis but both lines harbour the same mutation that leads to a  
42 truncation in the extreme C-terminus of GDV1. Introduction of the identified nonsense  
43 mutation into the genome of wild type parasite lines replicates the observed  
44 phenotype. Using a GDV1 overexpression line we show that the truncation in the  
45 GDV1 C-terminus does neither interfere with the nuclear import of GDV1 nor its  
46 interaction with HP1 *in vitro*, but appears important to sustain GDV1 protein levels  
47 and thereby sexual commitment.

48

49

## 50 **Importance**

51 Transmission of malaria causing *Plasmodium* species by mosquitos requires the  
52 parasite to change from a continuously growing asexual parasite form growing in the  
53 blood, to a sexually differentiated form, the gametocyte. Only a small subset of  
54 asexual parasites differentiates into gametocytes that are taken up by the mosquito.  
55 Transmission represents a bottleneck in the lifecycle of the parasite, so a molecular

56 understanding of the events that lead to stage conversion may identify novel  
57 intervention points. Here we screened a subset of kinases we hypothesized to play a  
58 role in this process. While we did not identify kinases required for sexual conversion,  
59 we identified a mutation in the C-terminus of the Gametocyte Development 1 protein  
60 (GDV1), which abrogates sexual development. The mutation destabilises the protein  
61 but not its interaction with its cognate binding partner HP1. This suggest an important  
62 role for the GDV1 C-terminus beyond trafficking and protein stability.

63

64

## 65 **Introduction**

66 Malaria is a devastating disease caused by parasites of the genus *Plasmodium*,  
67 leading to ~ 405,000 deaths per year <sup>1</sup>. *Plasmodium falciparum* causes the most  
68 severe and life-threatening form of human malaria. The complex life cycle involves  
69 interactions with multiple tissues in two different organisms, the human host and the  
70 mosquito vector. Inside the human host *P. falciparum* predominantly infects red blood  
71 cells (RBC) where it asexually replicates or, a small fraction (0-20%), commits to  
72 sexual development (gametocytogenesis) <sup>2</sup>. Gametocytogenesis occurs  
73 preferentially in the extravascular compartment in the bone marrow and spleen <sup>3-9</sup>.  
74 After 10-12 days mature stage V gametocytes are released into the peripheral  
75 circulation to allow transmission to mosquitoes.

76 Sexual commitment can be initiated by metabolic cues in the human host.  
77 Specifically, it has been described that depletion of lysophosphatidylcholine  
78 (LysoPC), a common component of human serum, leads to increased rates of  
79 gametocyte production and therefore represents the first molecularly defined factor  
80 known to inhibit or trigger sexual conversion <sup>10</sup>. Sexual commitment depends on  
81 upregulation of the *ap2-g* gene <sup>2,11</sup>, which requires removal of heterochromatin protein  
82 1 (HP1) from chromatin. HP1 interacts directly with the gametocyte development 1  
83 protein (GDV1), which causes HP1 to dissociate <sup>12</sup>. HP1 is responsible for repression  
84 of a range of genes <sup>13</sup>, while GDV1 specifically acts on the *ap2-g* locus. How this

85 specificity is achieved is not known. Furthermore, how a drop in LysoPC levels is  
86 sensed and transduced into GDV1-mediated HP1 removal is not understood.  
87 Kinases are key transducers of signals in cellular processes in various stages of the  
88 *Plasmodium* life cycle <sup>14,15</sup> and are likely candidates to play important roles in  
89 gametocyte commitment and development. A study by Solyakov et al <sup>14</sup> has identified  
90 a panel of likely and confirmed non-essential protein kinases, some of which are  
91 transcribed during sexual development (PlasmoDB) or in gametocytes<sup>16-19</sup>. Aiming to  
92 identify protein kinases involved in sexual development we screened eight KO lines  
93 for phenotypes in gametocyte induction and/or maturation. Two lines made no  
94 gametocytes, but subsequent validation showed that their gametocytogenesis defect  
95 was not due to the absence of these kinases. Instead, we found that both lines shared  
96 the same truncation in the C-terminal end of GDV1, which caused the loss of  
97 gametocyte development. Here, we address the importance and role of the GDV1 C-  
98 terminal for sexual commitment and interaction with HP1. We show that the loss of  
99 the C-terminal 39 amino acids of GDV1 does not interfere with nuclear import and  
100 interaction with HP1 in vitro, but prevents GDV1 from triggering efficient sexual  
101 commitment.

102

## 103 **Results**

### 104 **Identification and characterization of *Plasmodium falciparum* kinase KO lines** 105 **with a gametocytogenesis phenotype**

106 It has been shown previously in *P. berghei* that protein kinases non-essential during  
107 the asexual blood stages are essential in other lifecycle stages, for example during  
108 parasite transmission in the mosquito <sup>15</sup>. To identify kinases important for  
109 gametocytogenesis we investigated the role of a group of likely non-essential kinases  
110 <sup>14</sup> during asexual blood stages development. Using the lines described by Solyakov  
111 *et al* <sup>14</sup>, which have been generated by single crossover gene disruption, we induced  
112 sexual development using conditioned medium <sup>20</sup> and followed progression through

113 the stages I to V of gametocytogenesis (Figure 1a). Six of the eight KO lines displayed  
114 normal gametocyte development, while two, TKL2 (PF3D7\_1121300) and eIK2  
115 (PF3D7\_0107600) kinase KO lines, produced very few ( $\leq 0.1\%$ ) gametocytes (Figure  
116 1b). Of these, one has a disrupted tyrosine kinase like 2 (*tkl2*) locus, which has been  
117 characterized as a protein kinase secreted outside of the red blood cell<sup>17</sup>. Gene loss  
118 and accumulation of mutations is frequently observed in parasite lines kept in  
119 continuous *in vitro* culture over time and the loss of the ability to form gametocytes is  
120 not uncommon<sup>21</sup>. To exclude mutations in the *ap2-g* gene, which was identified  
121 through a loss of function mutant previously<sup>2</sup>, we sequenced the *ap2-g* locus in the  
122 3D7/TKL2 KO parasite line. The sequencing results confirmed that the phenotype  
123 observed was not associated with mutations in *ap2-g*, leading us to conclude that  
124 the deletion of TKL2 was possibly the cause for the observed phenotype. In order to  
125 verify the role of TKL2 in gametocyte induction, we generated a DiCre-mediated TKL2  
126 conditional KO line in NF54 parasites (NF54/TKL2:loxPint). We used CRISPR/Cas9 to  
127 simultaneously introduce a DiCre cassette into the *pfs47* locus, as previously  
128 described<sup>22,23</sup>, and to flank the kinases domain of *tkl2* with two loxPints (Figure 1c,  
129 Supplementary Figure 1a and b). To address the role of TKL2 in gametocyte  
130 development we treated the NF54/TKL2:loxPint line with DMSO (control) or  
131 rapamycin (KO) (Supplementary Figure 1b). We then induced sexual commitment  
132 using conditioned medium<sup>20</sup>, and monitored gametocyte development. No difference  
133 in commitment or development between the control and the rapamycin-induced  
134 NF54/TKL2:loxPint parasites (Figure 1d) were observed. These results show that  
135 TKL2 is not involved in sexual commitment or gametocyte development/maturation  
136 and another mutation is likely the cause for the observed phenotype.

137

138 **A common GDV1 truncation is found in both kinase KO lines deficient in**  
139 **gametocyte formation.**

140 The second kinase KO where a gametocytogenesis defect was identified was the  
141 eukaryotic initiation factor serine/threonine kinase 2 (eIK2) KO line (3D7/eIK2 KO)

142 (Supplementary Figure 2a). eIK2 has previously been characterized as non-essential  
143 during sexual development in *P. falciparum* and *P. berghei* and eIK2 KO lines  
144 appeared to undergo normal gametocyte development in rodent *Plasmodium*  
145 species<sup>24</sup>. This indicated that, as 3D7/TKL2 KO, the 3D7/eIK2 KO line also harbours  
146 a mutation preventing efficient gametocyte development. Sequencing of the *ap2-g*  
147 locus in this parasite line as described above showed no mutations in the coding  
148 region of *ap2-g*. Therefore, a potentially unknown mutation underlies the loss of  
149 gametocytes in these parasite lines.

150 To understand the nature of the block in sexual development we analysed the  
151 transcriptome of induced wildtype 3D7 parasites and in two eIK2 KO clones using  
152 RNAseq. Samples were collected for RNA extraction between 28-32 hours post-  
153 invasion (hpi) after induction with conditioned medium (Figure 2a). The RNAseq  
154 analysis revealed a significant downregulation in 3D7/eIK2 KO parasites of genes  
155 known to be upregulated during gametocytogenesis, including genes that have been  
156 shown to be AP2-G-dependent<sup>2,10,12,25-27</sup> (Figure 2b and Supplementary Table 1). We  
157 found *ap2-g* itself to be downregulated in 3D7/eIK2 KO parasites, but this reached  
158 significance only in one of the clones. Together with the lack of mutations in *ap2-g*  
159 itself, these results suggested that the block in gametocytogenesis was upstream of  
160 AP2-G function during sexual commitment. At that time, GDV1 was shown to be an  
161 upstream activator of AP2-G expression<sup>12</sup> so we sequenced the *gdv1* locus in the  
162 eIK KO clones and identified a nonsense mutation in *gdv1* that results in a premature  
163 stop codon leading to a C-terminal truncation of 39 amino acids (GDV1 $\Delta$ 39) (Figure  
164 2c and Supplementary Figure 2b). Sequencing of the 3D7/TKL2 KO parasite clones  
165 showed the same mutation (Supplementary Figure 2b), suggesting that the deletion  
166 of the last 39 amino acids of GDV1 in both mutant lines is responsible for the  
167 gametocytogenesis phenotype observed in both kinase KO lines.

168

169 **The carboxy-terminal 39 amino acids of GDV1 are important for its function**

170 To verify genetically the identified mutation in *gdv1* we generated an 3xHA-tagged  
171 version of GDV1 $\Delta$ 39 and introduced it in the endogenous *gdv1* locus in the NF54  
172 parasite line (NF54/GDV1 $\Delta$ 39:HA) (Figure 3a and Supplementary Figure 3a and b).  
173 GDV1 $\Delta$ 39:HA parasites lost the ability to form gametocytes (Figure 3b), suggesting  
174 the GDV1 C-terminus plays an essential role during sexual commitment or  
175 development. Determination of the localisation or expression levels of GDV1 $\Delta$ 39:HA  
176 was not possible, as we could not confidently distinguish true signal from background  
177 fluorescence. We repeatedly failed to obtain parasites expressing 3xHAtagged full  
178 length GDV1 from the endogenous locus to compare expression levels and the  
179 localisation of the truncated GDV1 version. Notably, direct C-terminal tagging of  
180 GDV1 at the endogenous locus was also not successful in other studies, unless when  
181 in combination with a destabilisation domain <sup>12,28</sup>.  
182 Therefore, we resorted to a system that allows robust testing of GDV1-dependent  
183 gametocyte induction. We introduced an ectopic *gdv1-gfp* fusion gene under control  
184 of the calmodulin promoter and a *glmS* ribozyme in the 3' untranslated region has  
185 been introduced into the *cg6* (*glp3*, PF3D7\_0709200) locus, allowing conditional  
186 overexpression of GDV1-GFP to trigger high gametocyte conversion rates  
187 (NF54/iGP2 line) <sup>29</sup>. In the presence of glucosamine, the *glmS* ribozyme destabilizes  
188 the mRNA preventing GDV1:GFP expression, while in the absence of glucosamine  
189 GDV1:GFP is overexpressed, leading to gametocyte induction <sup>30</sup>. For simplicity, the  
190 NF54/iGP2 line described by Boltryk and colleagues <sup>29</sup> has been renamed  
191 NF54/GDV1:GFP\_cOE in this study (cOE stands for conditional over expression). To  
192 test GDV1 $\Delta$ 39 function in this assay, we introduced a *gdv1 $\Delta$ 39-gfp-glmS* cassette  
193 into the *cg6* locus, generating a conditional GDV1 $\Delta$ 39:GFP overexpression parasite  
194 line (NF54/GDV1 $\Delta$ 39:GFP\_cOE) (Figure 3c and Supplementary Figure 3c and d). We  
195 then compared the sexual conversion rates in the NF54/GDV1:GFP\_cOE and  
196 NF54/GDV1 $\Delta$ 39:GFP\_cOE parasite lines in the presence and absence of

197 glucosamine. Unlike the NF54/GDV1:GFP\_cOE control line, the induced  
198 overexpression of GDV1 $\Delta$ 39:GFP in the NF54/GDV1 $\Delta$ 39:GFP\_cOE parasite line failed  
199 to trigger a significant increase in sexual commitment (Figure 3d). These results  
200 suggest that the full integrity of the GDV1 C-terminus is important for sexual  
201 commitment.

202

### 203 **GDV1 $\Delta$ 39 is imported into the nucleus and retains the ability to interact with HP1**

204 GDV1 is a nuclear protein and we hypothesized that the deletion of a predicted C-  
205 terminal nuclear bipartite localisation sequence (cNLS mapper, [http://nls-  
206 mapper.iab.keio.ac.jp/cgi-bin/NLS\\_Mapper\\_form.cgi](http://nls-mapper.iab.keio.ac.jp/cgi-bin/NLS_Mapper_form.cgi)) may interfere with GDV1  
207 nuclear localisation and hence its ability to interact with HP1 at heterchromatic loci.  
208 Therefore we localised GDV1 $\Delta$ 39:GFP in the NF54/GDV1 $\Delta$ 39:GFP\_cOE parasites by  
209 immunofluorescence at 28-32 hpi (Figure 4a and Supplementary Figure 3e). The  
210 results show a clear punctate and nuclear signal in the induced  
211 NF54/GDV1:GFP\_cOE parasite line, as previously reported (Supplementary Figure  
212 3e)<sup>12</sup>. NF54/GDV1 $\Delta$ 39:GFP\_cOE parasites also show a localized GFP signal in the  
213 nucleus, but the signal is weaker and more diffuse when compared with  
214 NF54/GDV1:GFP\_cOE (Supplementary Figure 3e). In order to quantify and compare  
215 GFP levels in NF54/GDV1:GFP\_cOE and NF54/GDV1 $\Delta$ 39:GFP\_cOE parasites, we  
216 performed a whole cell protein extraction for Western blot (WB) analysis using anti-  
217 GFP using anti-HSP70 antibodies as a loading control (Figure 4b and c). The WB  
218 showed a clear reduction of GDV1 $\Delta$ 39:GFP levels compared to GDV1:GFP (Figure  
219 4c). To quantify the localization of GDV1 $\Delta$ 39:GFP in the cytoplasm compared to the  
220 nucleus we prepared cytosolic and nuclear protein extracts using subcellular  
221 fractionation (Figure 4b and d). We determined the cytoplasmic fraction using anti-  
222 aldolase antibodies<sup>31</sup> and anti-histone 3 antibodies were used to determine the  
223 nuclear fraction<sup>32</sup>. GDV1 $\Delta$ 39:GFP was only detected in the nuclear fraction further



224 supporting that its nuclear localisation is not affected by the C-terminal truncation  
225 (Figure 4d). Thus, GDV1 $\Delta$ 39:GFP protein level is much reduced compared to  
226 GDV1:GFP, despite being expressed from the same locus and driven by the same  
227 promoter. To test if the GDV1 $\Delta$ 39 deletion affects its interaction with HP1, we  
228 performed an in vitro assay where 6xHIS-tagged GDV1 WT and  $\Delta$ 39 versions were  
229 co-expressed with Strep-tagged HP1 in *Escherichia coli* bacteria. Interaction  
230 between GDV1 and HP1 is detected by affinity purification of HIS:GDV1 and analysis  
231 of co-eluted proteins by Coomassie staining<sup>12</sup>. HIS-tagged SIP2 does not interact  
232 with HP1 and was used as a negative control (Figure 4e). As previously shown, HIS-  
233 GDV1 pulled down HP1, which was not observed when SIP2 was used as a bait<sup>12</sup>.  
234 Interestingly, the  $\Delta$ 39:GFP of GDV1 also pulled down HP1, indicating GDV1 C-  
235 terminus was not essential for the interaction in *E. coli* (Figure 4e). This observation  
236 indicates that the interaction of GDV1 $\Delta$ 39:GFP and HP1 can still occur in the parasite,  
237 but that it is insufficient to trigger gametocytogenesis. An explanation for this could  
238 be that GDV1 $\Delta$ 39:GFP levels do not reach the threshold required for efficient  
239 gametocyte induction. To examine expression of the GDV1 $\Delta$ 39 mutant, we analysed  
240 the mean fluorescence intensity in uninduced and induced NF54/GDV1:GFP\_cOE  
241 and NF54/GDV1 $\Delta$ 39:GFP\_cOE parasites at the single cell level using flow cytometry  
242 (Figure 4f and g). As expected, NF54/GDV1:GFP\_cOE parasites show a robust  
243 increase of GFP fluorescence upon induction of GDV1:GFP expression through  
244 glucosamine removal. A measurable increase of the mean fluorescence was also  
245 observed upon induction in most NF54/GDV1 $\Delta$ 39:GFP\_cOE parasites, but well below  
246 the levels observed for NF54/GDV1:GFP\_cOE parasites. However, a small proportion  
247 of NF54/GDV1 $\Delta$ 39:GFP\_cOE parasites displayed GFP fluorescence at the level  
248 observed in the NF54/GDV1:GFP\_cOE control line. In line with its nuclear localisation,

249 GDV1 $\Delta$ 39:GFP may contribute to form gametocytes in these parasites. This is further  
250 discussed below.

251

## 252 Discussion

253 The aim of this study was to identify non-essential kinases as regulators of  
254 gametocyte commitment/development in *P. falciparum*. While several parasite lines  
255 of the kinase knock-out collection<sup>14</sup> were able to form gametocytes, two kinase KO  
256 lines showed a gametocytogenesis phenotype that led to the identification of a  
257 nonsense mutation in *gdv1* that results in a 39 aa truncation of the GDV1 C-terminus.  
258 This mutation may have been acquired by the common parental line prior to  
259 generation of the original transgenic lines, although several other clones from the  
260 Solyakov study we tested here are able to form gametocytes, possibly reflecting that  
261 only a proportion of the parasite population in the parental line carried the mutation.  
262 Alternatively, it cannot be excluded that the mutation arose independently in these  
263 two lines. This might be clarified by carrying out WGS, but this lies outside the scope  
264 of the present study. Our results show that the premature stop codon mutation in  
265 *gdv1* resulting in a 39 amino acid C-terminal truncation in the *tlk2* and *elk2* KO lines  
266 is sufficient to abolish sexual commitment. Based on our analysis of inducible GDV1  
267 overexpression lines we observed that the truncated GDV1 $\Delta$ 39-GFP protein was  
268 present at substantially reduced protein levels compared to full-length GDV1-GFP.  
269 We propose that it is the loss of GDV1 stability that is the underlying cause for the  
270 lack of gametocytes in the GDV1 mutants. Although we have not further tested this  
271 here, the reduced amount of GDV1 protein shown in Western blots is likely caused  
272 by a destabilisation of the GDV1 protein due to the truncation. Alternatively, although  
273 unlikely, it could be caused by a reduction in *gdv1* transcripts. Regardless of the  
274 observed decrease of GDV1 protein levels, the truncation does neither result in a  
275 strong nuclear localisation defect when overexpressed as a GFP fusion protein, nor  
276 in a failure to interact with HP1 expressed in bacteria. It will be important to show in  
277 the future whether the few NF54/GDV1 $\Delta$ 39:GFP\_cOE parasites, which show similar

278 levels of GDV1 $\Delta$ 39:GFP compared to GDV1:GFP in NF54/GDV1:GFP\_cOE parasites,  
279 are able to induce gametocytogenesis. If they fail to do so, it would indicate additional  
280 functions of the GDV1 C-terminus, potentially contributing to bringing GDV1 to the  
281 *ap2-g* locus. In this respect, it would be of great interest to identify possible  
282 interactors of the GDV1 c-terminus.

283

284

## 285 **Material and Methods**

### 286 **Plasmid construction and transfection.**

287 The construction of each of the ePK knockout plasmids here characterized has been  
288 described in <sup>14</sup>. The *pMK-RQ-tkl2-loxPint* donor plasmid (synthesized by Genart)  
289 contains a recodonized version of sequence containing the glycine-rich loop in the  
290 kinase domain of *tkl2* (rc. Gly Loop) flanked by two loxPints and homology regions  
291 for homology-directed repair. The *pDC2-Cas9-hDHFRyFCU* guideRNA plasmid  
292 targeting *tkl2* locus (pDC2\_TKL2\_gRNA) was generated using the primer pairs  
293 pDC2\_TKL2\_gRNA1\_FOR/pDC2\_TKL2\_gRNA1\_REV. Because we didn't have a  
294 3D7::DiCre line, we generated the 3D7/TKL2:loxPint conditional KO line by doing, for  
295 the first time, a double transfection with the *pMK-RQ-tkl2-loxPint* and  
296 pDC2\_TKL2\_gRNA, together with the pBSPfs47DiCre (containing the DiCre cassette)  
297 and the CRISPR/Cas9 plasmid pDC287 containing the guide RNA targeting the Pfs47  
298 locus, as previously described <sup>23</sup>. The plasmids were suspended in 100uL of P3  
299 primary cell solution, 40ug of each rescue plasmid and 20ug of *pDC2-Cas9-*  
300 *hDHFRyFCU guide RNA* for each respective rescue plasmid, and transfected into the  
301 3D7 parasites. Briefly, purified *P. falciparum* 3D7 schizont stages were  
302 electroporated using using Amaxa 4D-Nucleofector™ (Lonza) - program FP158 <sup>33</sup>.  
303 Selection of parasites transfected was done using 5nM WR99210 (Jacobus  
304 Pharmaceutical) and after a first round of selection, cloned.

305 To generate the *pMK-RQ-gdv1 $\Delta$ 39-HA* plasmid, which upon integration into the  
306 endogenous *gdv1* locus mimics the mutation found in the kinase KO lines, the *gdv1*

307 (PF3D7\_0935400) 3' homology region was PCR amplified from NF54 genomic DNA  
308 with primers #268/#269 (Supplementary Table 2). The amplified PCR fragment was  
309 Gibson-cloned into an AflIII-digested plasmid synthesized by Geneart that contains  
310 a *gdv1* 5' homology sequence followed by a recodonized truncated *gdv1Δ39* version  
311 and the sequence encoding the 3xHA tag (Supplementary Table 2). To generate the  
312 pD\_cg6\_cam-gdv1Δ39-gfp-glmS plasmid we amplified the *gdv1Δ39* sequence from  
313 the pMK-RQ-gdv1Δ39-HA plasmid using primers #383/#384 (Supplementary Table  
314 2) and introduced the PCR fragment using Gibson assembly into the donor plasmid  
315 pD\_cg6\_cam-gdv1-gfp-glmS<sup>29</sup> digested with EagI and BsaBI. The guideRNA  
316 cassette to mutate endogenous *gdv1* was generated using the primer pairs  
317 pDC2\_GDV1Δ39\_gRNA1\_FOR/pDC2\_GDV1Δ39\_gRNA1\_REV and cloned into the  
318 pDC2-Cas9-hDHFRyFCU plasmid as previously described<sup>22</sup>. The rescue plasmid  
319 *pMK-RQ-gdv1Δ39-HA* and the CRISPR/Cas9 plasmid *pDC2-Cas9-hDHFRyFCU*  
320 were suspended in 100uL of P3 primary cell solution, 40ug and 20ug DNA  
321 respectively, and transfected using Amaxa 4D-Nucleofector™ (Lonza). Briefly,  
322 purified *P. falciparum* NF54::DiCre schizont stages were electroporated using  
323 program FP158<sup>33</sup>. Selection of parasites transfected was done using 5nM WR99210  
324 (Jacobus Pharmaceutical) and after a first round of selection, cloned. Transfection  
325 of NF54 parasites using the CRISPR/Cas9 pHF\_gC-cg6 suicide plasmid<sup>29</sup> and the  
326 *pD\_cg6\_cam-gdv1Δ39-gfp-glmS* donor construct was performed as described  
327 previously<sup>12</sup>. 50 μg each of the suicide plasmid and donor plasmid were transfected  
328 and parasites cultured in the presence of glucosamine to block  
329 NF54/GDV1Δ39:GFP\_cOE protein overexpression. 24 hours after transfection and for  
330 six subsequent days in total, the transfected populations were treated with 4 nM  
331 WR99210 and then cultured in absence of drug selection until a stably propagating  
332 transgenic population was obtained. All primers, guide RNAs and fragments used in  
333 the construction and integration of the constructs as well as confirmation of  
334 rapamycin mediated excision are described in Supplementary Table 2.

335

336 ***Plasmodium falciparum* in vitro culture of asexual and sexual blood stages.**

337 *Plasmodium falciparum* parasite lines used in this study were all derived from the  
338 NF54 strain (originally isolated from an imported malaria case in the Netherlands in  
339 the 1980s; BEI Resources, cat. no. MRA-1000)<sup>34</sup>. Asexual parasites were cultured in  
340 human blood (UK National Blood Transfusion Service) and RPMI 1640 medium  
341 containing 0.5% w/v AlbumaxII (Invitrogen) at 37°C, as previously described<sup>35</sup>.  
342 Asexual parasites were used to produce gametocytes by seeding asexual rings at  
343 1% or 3% parasitaemia and 4% haematocrit on day 0 and feeding the parasites once  
344 a day during 15 days (day 0 to day 14) in 3% O<sub>2</sub>-5% CO<sub>2</sub>-92% N<sub>2</sub> gas, in RPMI  
345 complemented with 25mM HEPES, 50mg/liter hypoxanthine, 2g/L sodium  
346 bicarbonate, 10% human serum<sup>35,36</sup>.

347

348 ***Plasmodium falciparum* sexual induction**

349 Sexual induction of parasite lines was done by following Trager protocol<sup>35</sup>. More  
350 specifically, gametocyte induction was started with a 3% asexual ring culture where  
351 sexual commitment was induced by using 50% spent medium, expecting the sexually  
352 committed merozoites to invade and develop during the next cycle<sup>20,35</sup>. The  
353 overexpressing NF54/GDV1:GFP\_cOE and NF54/GDV1Δ39:GFP\_cOE parasite lines  
354 were kept in the constant presence of 2.5 mM glucosamine to block ectopic GDV1  
355 expression and therefore sexual induction, while sexual induction was achieved  
356 culturing the parasites in the absence of glucosamine, as previously described<sup>29</sup>.

357

358 **Time course of gametocyte induction, RNA extraction and RNA-seq library  
359 preparation.**

360 The samples were collected during the asexual cycle at 28-32 hpi and in the  
361 matching cycle at 28-32 hpi after induction of sexual commitment. The infected RBCs  
362 pellets were collected at the respective time point, centrifuged and solubilized in ten  
363 volumes of TRIzol (Ambion) prewarmed to 37°C, lysed for 5 minutes by mixing

364 vigorously at 37°C and immediately frozen at -80°C until extraction. Complete RNA  
365 was isolated from the samples using Trizol/chloroform extraction followed by  
366 isopropanol precipitation<sup>22</sup> and its concentration and integrity was verified using  
367 Agilent Bioanalyzer (RNA 6000 Nano kit) and NanoDrop 1000 spectrophotometer. 1-  
368 2 µg of total RNA from each sample (or complete sample if the yield was lower) was  
369 used for mRNA isolation (Magnetic mRNA Isolation Kit, NEB). First strand cDNA  
370 synthesis was performed using the SuperScript III First-Strand Synthesis System and  
371 a 1:1 mix of Oligo(dT) and random primers (Invitrogen). The DNA-RNA hybrids were  
372 purified using Agencourt RNACleanXP beads (Beckman Coulter) and the second  
373 cDNA strand was synthesized using a 10 mM dUTP nucleotide mix, DNA Polymerase  
374 I (Invitrogen) and RNaseH (NEB) for 2.5 h at 16°C. The long cDNA fragments were  
375 purified and fragmented using a Covaris S220 system (duty cycles = 20, intensity =  
376 5, cycles/burst = 200, time = 30s). The ~200 bp long fragments were end-repaired,  
377 dA-tailed and ligated to “PCR-free” adapters<sup>37</sup> with index tags using NEBNext  
378 according to the manufacturer’s instructions. Excess adapters were removed by two  
379 rounds of clean-up with 1 volume of Agencourt AMPure XP beads. Final libraries were  
380 eluted in 30 µl water, quality-controlled using Agilent Bioanalyzer (High Sensitivity  
381 DNA chip) digested with USER enzyme (NEB) and quantified by qPCR. For some  
382 libraries additional 5 cycles of PCR amplification were performed, using KAPA HiFi  
383 HotStart PCR mix and Illumina tag-specific primers to obtain enough material for  
384 sequencing. Pools of indexed libraries were sequenced using an Illumina HiSeq2500  
385 system (100 bp paired-end reads) according to manufacturer’s manual. All samples  
386 were generated in duplicates or triplicates and uninduced controls were always  
387 generated and processed in parallel. Raw data is available through GEO database  
388 repository (study GSE158689).

389

### 390 **RNAseq data analysis**

391 The generation of raw data in the form of \*.cram files quality control and adapter  
392 trimming was performed using the default analysis pipelines of the Sanger Institute.

393 The raw data was transformed into paired \*. fastq files using Samtools software (ver.  
394 1.3.1). The generated reads were re-aligned to *Plasmodium falciparum* genome  
395 (PlasmoDB-30 release) in a splice aware manner with HISAT2<sup>38</sup> using --known-  
396 splicesite-infile option within the splicing sites file generated based on the current  
397 genome annotation. Resulting \*.bam files were sorted and indexed using Samtools  
398 and inspected visually using Integrated Genome Viewer (ver. 2.3.91). HT-seq python  
399 library<sup>38</sup> was used to generate reads counts for all genes for further processing. Raw  
400 counts were normalised to median-ratio and then tested against linear models of time nested in  
401 line and line nested within time using a negative binomial model for the normalised counts  
402 using DESeq2, differential genes being selected for a false discovery rate of < 0.1<sup>39</sup>.

403

#### 404 **Saponin lysis and whole cell, cytoplasmic and nuclear protein extraction**

405 10mL parasite culture (2-5% parasitemia, 4% haematocrit) was transferred to a 15  
406 mL tube and centrifuged at 600 g for 5 min. The supernatant was aspirated and the  
407 RBC pellet resuspended in 5 volumes 0.15% saponin solution (2.5 mL for 500  $\mu$ L  
408 RBC). After an incubation on ice of max. 10 min, the parasites were centrifuged at  
409 1503 g for 5 min at 4°C. Subsequent steps were performed on ice in order to prevent  
410 protein degradation. The supernatant was aspirated and the parasite pellet  
411 resuspended in 1 mL cold phosphate buffered saline (PBS) and transferred to an  
412 Eppendorf tube. The parasite pellet was centrifuged at 1503 g for 30 sec at 4°C and  
413 washed with cold PBS until the supernatant was clear.

414 For whole cell protein extraction, one pellet volume (30-50  $\mu$ L) of whole cell protein  
415 lysis buffer (8 M Urea, 5% SDS, 50 mM Bis-Tris, 2 mM EDTA, 25 mM HCl, pH 6.5)  
416 complemented with 1x protease inhibitor cocktail (Merck) and 1 mM DTT was added  
417 to the pellet at RT in order to lyse the parasites . The tube was vortexed, heated to  
418 94°C for 5 min, sonicated for 2 min (5 cycles of 30 sec ON/ 30sec OFF), vortexed and  
419 heated again. Subsequently, the protein sample was centrifuged at

420 20238 g for 5 min at RT and the supernatant was transferred into a new tube, which  
421 was frozen at -20°C and stored until use.

422 For cytoplasmic and nuclear protein extraction, the parasite pellet was lysed in 300µL  
423 cytoplasmic lysis buffer (20 mM Hepes (pH 7.9), 10 mM KCl, 1 mM EDTA, 0.65%  
424 Igepal) complemented with 1x protease inhibitor cocktail (Merck) and 1 mM DTT  
425 (leaving the nucleus intact) and incubated on ice for 5 min (Voss et al., JBC, 2002).  
426 The lysed parasites were centrifuged at 845 g for 3 min, the supernatant representing  
427 the cytoplasmic protein fraction was transferred into a new tube and placed on ice.  
428 The remaining nuclear pellet was washed in 500 µL cytoplasmic lysis buffer and  
429 centrifuged at 845 g for 3 min. The washing was repeated until the supernatant was  
430 clear. The nuclear pellet was resuspended in 60 µL whole cell lysis buffer and  
431 vortexed at high speed at RT for 10-20 min. The insoluble material was centrifuged  
432 at 20238 g for 3 min, the supernatant representing the nuclear protein fraction was  
433 transferred to a new tube and placed on ice. Both protein fractions were frozen at -  
434 20°C and stored until use.

435

#### 436 **Western Blot.**

437 Parasite extracts were solubilized in protein loading buffer, denatured at 95°C for  
438 10min, subjected to SDS-PAGE and transferred onto a nitrocellulose membrane.  
439 Membranes were immunostained with mouse anti-GFP (1:250 dilution; Roche,  
440 11814460001), rabbit anti-Aldolase-HRP conjugated (1:5000 dilution, abcam  
441 ab38905) and rabbit anti-Histone 3 (1:2000 dilution, abcam ab1791) primary  
442 antibodies. Antibody detection was done using chemiluminescent western blot  
443 detection using goat anti-mouse secondary antibody conjugated with HRP and the  
444 ECL western blotting detection reagents (Amersham RPN2106) or by direct infrared  
445 fluorescence detection on the Odyssey Infrared Imaging System (Odyssey CLx, LI-  
446 COR) using IRDye 680LT goat anti-rat IgG (1:10000 dilution; LI-COR) and IRDye  
447 800CW goat anti-rabbit IgG (1:10000 dilution; LI-COR).

448



449 **Immunofluorescence assay at different parasite stages.** Air-dried thin blood films of  
450 asexual parasites were fixed with 4% paraformaldehyde containing 0.0075%  
451 glutaraldehyde for 15 min and permeabilized in 0.1% (v/v) Triton X-100 (Sigma) for  
452 10 min<sup>40</sup>. Blocking was performed in 3% BSA for 1 h. Slides were incubated with rat  
453 anti-HA high-affinity (1:1000 dilution; Roche, clone 3F10) at room temperature for 30  
454 min, followed by Alexa fluor conjugated goat anti-rat IgG (1:1000 dilution; Thermo  
455 Fisher Scientific) at room temperature for 30 min. Parasite nuclei were stained with 4',  
456 6-diamidino-2-phenylindole (DAPI; Invitrogen). Slides were mounted in ProLong®  
457 Gold antifade reagent (Invitrogen) and images were obtained with the inverted  
458 fluorescent microscope (Ti-E; Nikon, Japan) and processed using NIS-Elements  
459 software (Nikon, Japan).

460

#### 461 **Flow Cytometry**

462 NF54/GDV1:GFP\_cOE and NF54/GDV1Δ39:GFP\_cOE parasites were grown in the  
463 presence or absence of glucosamine in order to block or allow sexual commitment,  
464 respectively. Schizonts from the 4 conditions were purified by percoll gradient and  
465 allowed to invade fresh red blood cells for 4h, before uninvaded schizonts were  
466 removed. Flow cytometry analysis was performed at approximately 44h post invasion,  
467 in 4 biological replicates. For one replicate, parasites were fixed for 1h in 4%  
468 paraformaldehyde in PBS, stained with Hoechst 33342 (1:1000 in PBS) for 10 minutes  
469 and analysed on an LSRFortessa flow cytometer (Becton Dickinson) using FACSDiva  
470 software. For the other three replicates, live parasites were stained with Hoeschst  
471 33342 and analysed on a BD FACSAria II flow cytometer (Becton Dickinson) using  
472 FACSDiva software. Hoechst fluorescence was detected using a 355nm (UV)  
473 excitation laser with a 450/50nm bandpass filter, while GFP fluorescence was  
474 detected with a 488nm (blue) excitation laser, a 505nm longpass filter and a  
475 530/30nm bandpass filter. At least 30,000 cells were counted for each sample. Data  
476 were analysed using FCS Express 7 (Research Edition) software. The population was  
477 first gated on single cells based on the side and forward scatter, then on highly

478 Hoechst-positive infected schizonts, before the median fluorescence intensity (MFI)  
479 of the GFP-fluorescence was calculated for each line. An example of the gating  
480 strategy for infected cells is shown in Supplementary Figure 4. Due to the variation in  
481 fluorescence intensity between different experiments, MFI values were normalised by  
482 dividing the MFI of each infected sample by the average MFI of the uninfected  
483 samples within the same experiment (n=4). Statistical analysis was performed using  
484 Holm-Sidak corrected multiple comparison analysis of variance (ANOVA) on samples  
485 paired within each experiment using Graphpad Prism version 8.

486

### 487 **In vitro protein-protein interaction experiments**

488 In order to co-express Strep(II)-tagged HP1 with a His-SUMO-tagged truncated  
489 version of GDV1, we deleted the 39 C-terminal amino acids of the coding sequence  
490 of GDV1 in the vector pStrep-HP1\_HS-GDV1<sup>12</sup>. For this purpose, we circularized a  
491 PCR product amplified from this vector with the primers D39F and D39R using Gibson  
492 assembly. The proteins were expressed and the in vitro interaction assay was  
493 performed as previously described (14) using full-length GDV1 as positive and SIP2  
494 as negative control.

495

### 496 **FUNDING**

497 This work was supported by the Marie Skłodowska-Curie Individual Fellowship to  
498 Marta Tibúrcio (grant agreement 661167 — PFSEXOME — H2020-MSCA-IF-2014)  
499 and core funding to MT by the Francis Crick Institute (<https://www.crick.ac.uk/>), which  
500 receives its core funding from Cancer Research UK (FC001189;  
501 <https://www.cancerresearchuk.org>), the UK Medical Research Council (FC001189;  
502 <https://www.mrc.ac.uk/>), and the Wellcome Trust (FC001189;  
503 <https://wellcome.ac.uk/>). The Bioinformatics and Flow Cytometry STPs are supported  
504 through Crick Core funding (FC001999). This work was further supported by a  
505 research grant to T.V from the Swiss National Science Foundation (BSCGI0\_157729).

506 OB acknowledges funding by Wellcome core grant 206194/Z/17/Z to the Sanger  
507 Institute.

508

509

## 510 ACKNOWLEDGEMENTS

511 We would like to thank Christian Doerig for the original *Plasmodium falciparum* kinase  
512 KO lines. We would like to thank Frank Schwach and Mandy Sanders for preparing,  
513 running and initial quality control of RNAseq samples. We would like to thank Ellen  
514 Knuepfer and Christiaan van Ooij for the pBSPfs47DiCre and pDC287 plasmids, as  
515 well as scientific advice. We would like to thank Kostas Kousis for his help with the  
516 Flow Cytometry data acquisition.

## 517 AUTHOR CONTRIBUTIONS

518 M. Tibúrcio and M. Treeck conceived the study. M. Tibúrcio performed most of the  
519 parasite genetic manipulations and all the parasite line phenotyping experiments, as  
520 well as RNAseq material collection. E. Hitz generated the NF54/GDV1Δ39:GFP\_cOE  
521 parasite line, I. Niederwieser performed the in vitro protein-protein interaction  
522 experiments and T. S. Voss supervised these experiments and provided conceptual  
523 advice and resources. Gavin Kelly performed RNAseq analysis. RNAseq samples  
524 were run in Oliver Billkers group at the Sanger Institute. H. Davies performed the Flow  
525 Cytometry Data Analysis. Christian Doerig provided the original *P. falciparum* kinase  
526 KO cell lines. All authors contributed to experimental design and interpretation of the  
527 results. M. Tibúrcio and M. Treeck wrote the article with contributions from all authors.

528 Competing interests

529 We declare that we have no competing interests.

530

531

## 532 References

- 533 1. World Malaria Report 2019. World Health Organization, 2019.
- 534 2. Kafsack BF, Rovira-Graells N, Clark TG, et al. A transcriptional switch underlies  
535 commitment to sexual development in malaria parasites. *Nature* 2014; 507(7491):  
536 248-52.
- 537 3. Aguilar R, Magallon-Tejada A, Achtman AH, et al. Molecular evidence for the  
538 localization of *Plasmodium falciparum* immature gametocytes in bone marrow. *Blood*  
539 2014; 123(7): 959-66.
- 540 4. De Niz M, Meibalan E, Mejia P, et al. *Plasmodium* gametocytes display homing  
541 and vascular transmigration in the host bone marrow. *Sci Adv* 2018; 4(5): eaat3775.
- 542 5. Farfour E, Charlotte F, Settegrana C, Miyara M, Buffet P. The extravascular  
543 compartment of the bone marrow: a niche for *Plasmodium falciparum* gametocyte  
544 maturation? *Malar J* 2012; 11: 285.
- 545 6. Joice R, Nilsson SK, Montgomery J, et al. *Plasmodium falciparum* transmission  
546 stages accumulate in the human bone marrow. *Sci Transl Med* 2014; 6(244): 244re5.
- 547 7. Smalley MEA, S.; Brown, J. The distribution of *Plasmodium falciparum* in the  
548 peripheral blood and bone marrow of Gambian children. *Trans R Soc Trop Med Hyg*  
549 1981; 75: 103-5.
- 550 8. Thomson JGR, A. The structure and development of *Plasmodium falciparum*  
551 gametocytes in the internal organs and peripheral circulation. . *Trans R Soc Trop Med*  
552 *Hyg* 1935; 29 31–40.
- 553 9. Marchiafava EAB, A. Sulle Febbri Malariche Estivo Autunnali Innocenzo Artero;  
554 1892.
- 555 10. Brancucci NMB, Gerdt JP, Wang C, et al. Lysophosphatidylcholine Regulates  
556 Sexual Stage Differentiation in the Human Malaria Parasite *Plasmodium falciparum*.  
557 *Cell* 2017; 171(7): 1532-44 e15.
- 558 11. Sinha A, Hughes KR, Modrzynska KK, et al. A cascade of DNA-binding  
559 proteins for sexual commitment and development in *Plasmodium*. *Nature* 2014;  
560 507(7491): 253-7.

- 561 12. Filarsky M, Fraschka SA, Niederwieser I, et al. GDV1 induces sexual  
562 commitment of malaria parasites by antagonizing HP1-dependent gene silencing.  
563 Science 2018; 359(6381): 1259-63.
- 564 13. Brancucci NMB, Bertschi NL, Zhu L, et al. Heterochromatin protein 1 secures  
565 survival and transmission of malaria parasites. Cell Host Microbe 2014; 16(2): 165-  
566 76.
- 567 14. Solyakov L, Halbert J, Alam MM, et al. Global kinomic and phospho-proteomic  
568 analyses of the human malaria parasite *Plasmodium falciparum*. Nat Commun 2011;  
569 2: 565.
- 570 15. Tewari R, Straschil U, Bateman A, et al. The systematic functional analysis of  
571 *Plasmodium* protein kinases identifies essential regulators of mosquito transmission.  
572 Cell Host Microbe 2010; 8(4): 377-87.
- 573 16. Lopez-Barragan MJ, Lemieux J, Quinones M, et al. Directional gene  
574 expression and antisense transcripts in sexual and asexual stages of *Plasmodium*  
575 *falciparum*. BMC Genomics 2011; 12: 587.
- 576 17. Abdi AI, Carvalho TG, Wilkes JM, Doerig C. A secreted *Plasmodium falciparum*  
577 kinase reveals a signature motif for classification of tyrosine kinase-like kinases.  
578 Microbiology 2013; 159(Pt 12): 2533-47.
- 579 18. Pelle KG, Oh K, Buchholz K, et al. Transcriptional profiling defines dynamics  
580 of parasite tissue sequestration during malaria infection. Genome Med 2015; 7(1):  
581 19.
- 582 19. Lasonder E, Rijpma SR, van Schaijk BC, et al. Integrated transcriptomic and  
583 proteomic analyses of *P. falciparum* gametocytes: molecular insight into sex-specific  
584 processes and translational repression. Nucleic Acids Res 2016; 44(13): 6087-101.
- 585 20. Fivelman QL, McRobert L, Sharp S, et al. Improved synchronous production  
586 of *Plasmodium falciparum* gametocytes in vitro. Mol Biochem Parasitol 2007; 154(1):  
587 119-23.

- 588 21. Claessens A, Affara M, Assefa SA, Kwiatkowski DP, Conway DJ. Culture  
589 adaptation of malaria parasites selects for convergent loss-of-function mutants. *Sci*  
590 *Rep* 2017; 7: 41303.
- 591 22. Knuepfer E, Napiorkowska M, van Ooij C, Holder AA. Generating conditional  
592 gene knockouts in *Plasmodium* - a toolkit to produce stable DiCre recombinase-  
593 expressing parasite lines using CRISPR/Cas9. *Sci Rep* 2017; 7(1): 3881.
- 594 23. Tiburcio M, Yang ASP, Yahata K, et al. A Novel Tool for the Generation of  
595 Conditional Knockouts To Study Gene Function across the *Plasmodium falciparum*  
596 Life Cycle. *mBio* 2019; 10(5).
- 597 24. Zhang M, Fennell C, Ranford-Cartwright L, et al. The *Plasmodium* eukaryotic  
598 initiation factor-2 $\alpha$  kinase IK2 controls the latency of sporozoites in the mosquito  
599 salivary glands. *J Exp Med* 2010; 207(7): 1465-74.
- 600 25. Poran A, Notzel C, Aly O, et al. Single-cell RNA sequencing reveals a signature  
601 of sexual commitment in malaria parasites. *Nature* 2017; 551(7678): 95-9.
- 602 26. Bancells C, Llorca-Batlle O, Poran A, et al. Revisiting the initial steps of sexual  
603 development in the malaria parasite *Plasmodium falciparum*. *Nat Microbiol* 2019;  
604 4(1): 144-54.
- 605 27. Josling GA, Russell TJ, Venezia J, et al. Dissecting the role of PfAP2-G in  
606 malaria gametocytogenesis. *Nat Commun* 2020; 11(1): 1503.
- 607 28. Usui M, Prajapati SK, Ayanful-Torgby R, et al. *Plasmodium falciparum* sexual  
608 differentiation in malaria patients is associated with host factors and GDV1-  
609 dependent genes. *Nat Commun* 2019; 10(1): 2140.
- 610 29. Boltryk SD, Passecker A, Alder A, et al. CRISPR/Cas9-engineered inducible  
611 gametocyte producer lines as a novel tool for basic and applied research on  
612 *Plasmodium falciparum* malaria transmission stages. *bioRxiv* 2020.
- 613 30. Prommana P, Uthaipibull C, Wongsombat C, et al. Inducible knockdown of  
614 *Plasmodium* gene expression using the glmS ribozyme. *PLoS One* 2013; 8(8):  
615 e73783.

- 616 31. Knapp B, Hundt E, Kupper HA. Plasmodium falciparum aldolase: gene  
617 structure and localization. Mol Biochem Parasitol 1990; 40(1): 1-12.
- 618 32. Salcedo-Amaya AM, van Driel MA, Alako BT, et al. Dynamic histone H3  
619 epigenome marking during the intraerythrocytic cycle of Plasmodium falciparum.  
620 Proc Natl Acad Sci U S A 2009; 106(24): 9655-60.
- 621 33. Moon RW, Hall J, Rangkuti F, et al. Adaptation of the genetically tractable  
622 malaria pathogen Plasmodium knowlesi to continuous culture in human erythrocytes.  
623 Proc Natl Acad Sci U S A 2013; 110(2): 531-6.
- 624 34. Delves MJ, Straschil U, Ruecker A, et al. Routine in vitro culture of P. falciparum  
625 gametocytes to evaluate novel transmission-blocking interventions. Nat Protoc 2016;  
626 11(9): 1668-80.
- 627 35. Trager W, Jensen JB. Human malaria parasites in continuous culture. Science  
628 1976; 193(4254): 673-5.
- 629 36. Delves MJ, Ruecker A, Straschil U, et al. Male and female Plasmodium  
630 falciparum mature gametocytes show different responses to antimalarial drugs.  
631 Antimicrob Agents Chemother 2013; 57(7): 3268-74.
- 632 37. Kozarewa I, Ning Z, Quail MA, Sanders MJ, Berriman M, Turner DJ.  
633 Amplification-free Illumina sequencing-library preparation facilitates improved  
634 mapping and assembly of (G+C)-biased genomes. Nat Methods 2009; 6(4): 291-5.
- 635 38. Anders S, Pyl PT, Huber W. HTSeq--a Python framework to work with high-  
636 throughput sequencing data. Bioinformatics 2015; 31(2): 166-9.
- 637 39. Love MI, Huber W, Anders S. Moderated estimation of fold change and  
638 dispersion for RNA-seq data with DESeq2. Genome Biol 2014; 15(12): 550.
- 639 40. Tonkin CJ, van Dooren GG, Spurck TP, et al. Localization of organellar proteins  
640 in Plasmodium falciparum using a novel set of transfection vectors and a new  
641 immunofluorescence fixation method. Mol Biochem Parasitol 2004; 137(1): 13-21.  
642  
643  
644

645 **Figure Legends**

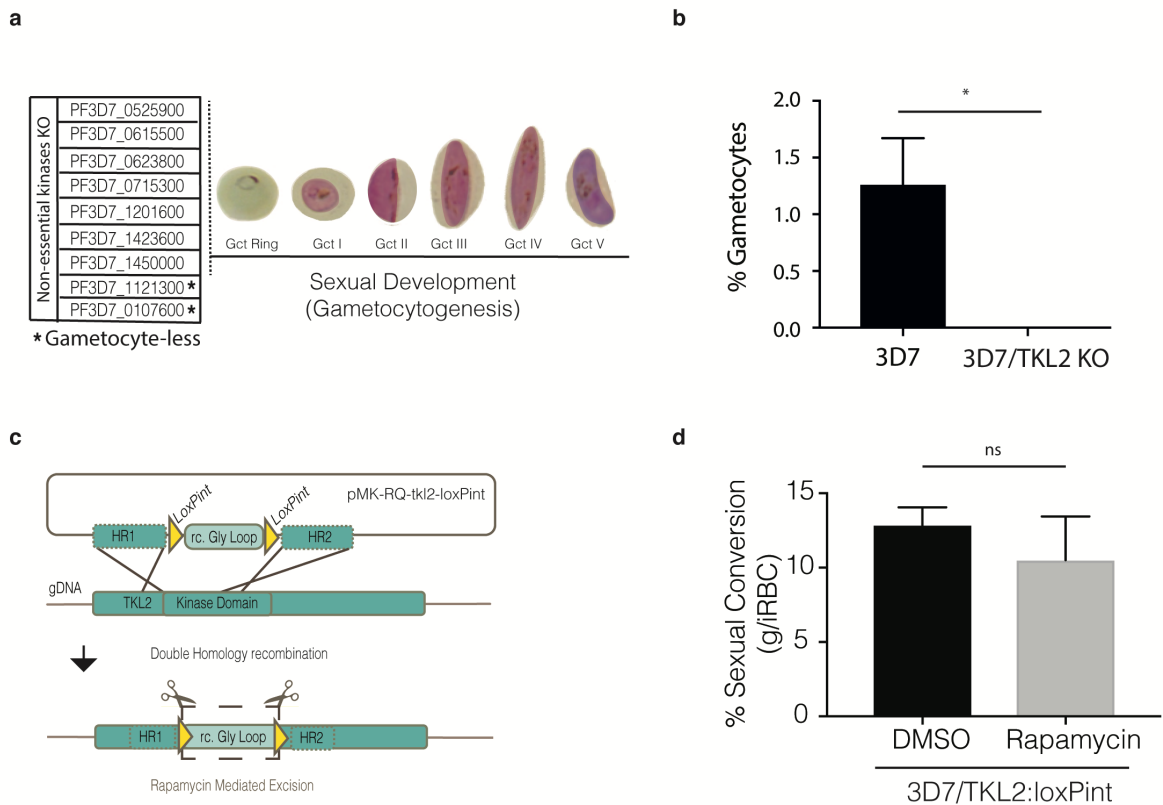

646

647 **Figure 1. Screening of Plasmodium falciparum non-essential kinases during sexual**

648 **commitment and development.** A) List of non-essential kinases characterized during

649 sexual development in this study (PF3D7\_0107600 – eIK2; PF3D7\_0525900 - NEK2;

650 PF3D7\_0615500 – CRK5; PF3D7\_0623800 – TKL4; PF3D7\_0715300 -

651 calcium/calmodulin-dependent protein kinase, putative; PF3D7\_1121300 – TKL2;

652 PF3D7\_1201600 - NEK3; PF3D7\_1423600 - calcium-dependent protein kinase,

653 putative; PF3D7\_1450000 - serine/threonine protein kinase, putative) <sup>14</sup>. B)

654 Comparison of the percentage of gametocytaemia between the 3D7 WT line and the

655 PftKL2 kinase KO clones of the same transfection (clones B10 and B12) generated

656 by single crossover integration <sup>14</sup>. Each column represents the mean of triplicate

657 microscope counts, each of at least 500 cells, analysed using paired t test,  $\pm$  SD, (\*;

658  $p < 0.05$ ; 3D7 versus TKL2 KO clones,  $P = 0.0377$ ). C) Schematic of the CRISPR/Cas9

659 strategy used to generate a TKL2 conditional knockout (KO) line (3D7/TKL2:loxPint)

660 as well as the primers used to confirm successful gene editing (Supplementary Table

661 2); The *pMK-RQ-tkl2-loxPint* donor plasmid contains a recodonzed version of the



662 glycine loop in the kinase domains of *tkl2* (rc. Gly Loop) flanked by two loxPints and  
 663 homology regions for homology-directed repair. D) Sexual conversion rates in  
 664 3D7/TKL2:loxPint parasites treated with DMSO (control) or rapamycin (KO). Each  
 665 column represents the mean of triplicate microscope counts, each of at least 500  
 666 cells, analysed using paired t test  $\pm$  SD, (ns,  $p \geq 0.05$ ; 3D7/TKL2:loxPint treated with  
 667 DMSO versus Rapamycin,  $P=0.4017$ ).  
 668

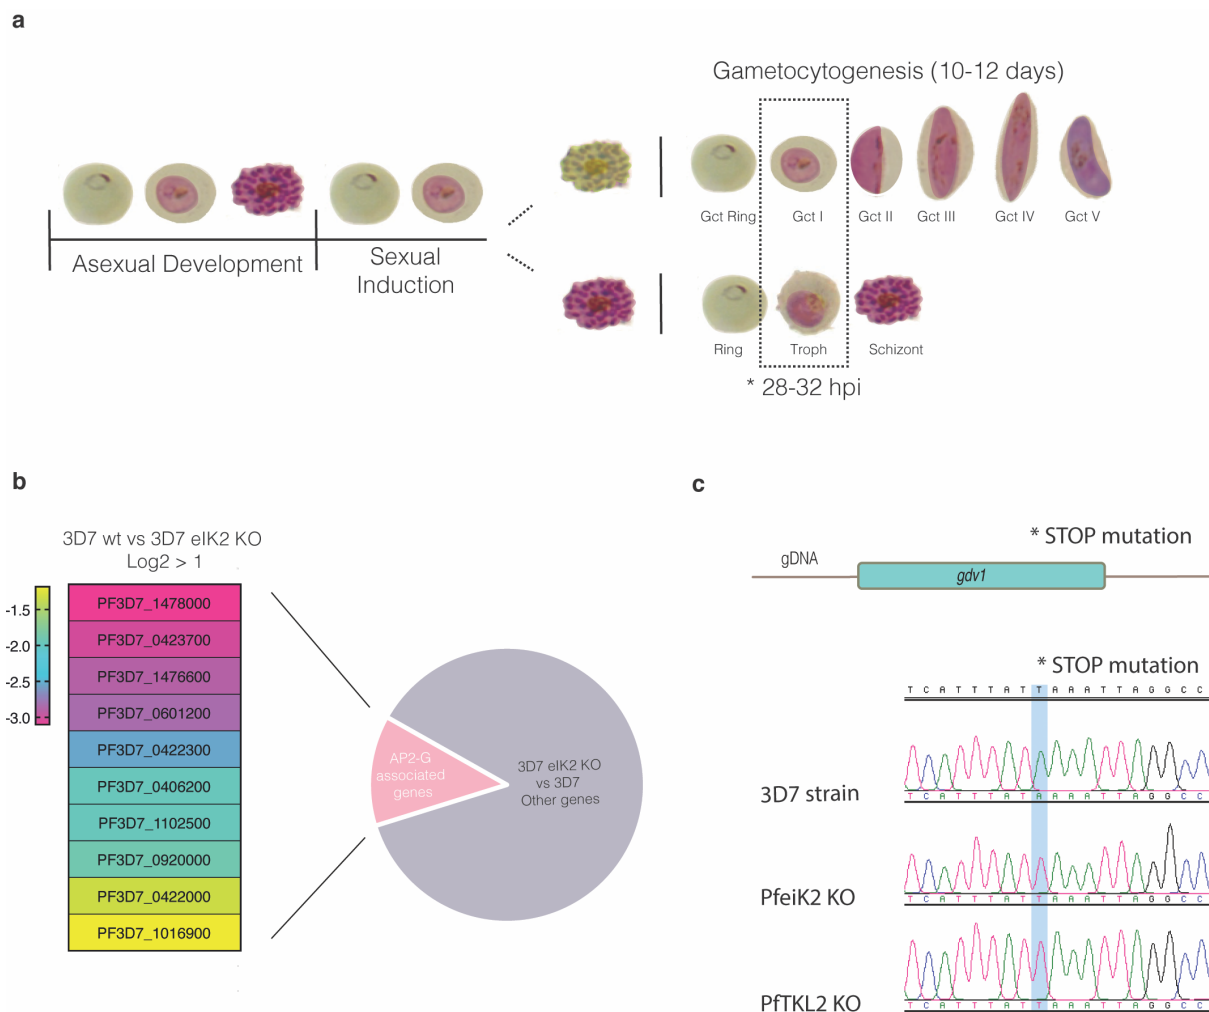

669  
 670 **Figure 2. RNA sequencing analysis comparing WT and PfeiK2 gametocyte-less**  
 671 **kinase KO line.** A) Representation of the interactive cycles of asexual and sexual  
 672 differentiation upon sexual induction; dotted box illustrates the time point and asexual  
 673 and sexual stages of the parasite collected for RNAseq. B) Heatmap showing genes  
 674 previously described as being associated with AP2-G expression and significantly

675 downregulated in the PflK2 kinase KO clones (log2 fold change >1). C) DNA  
 676 sequence trace showing the stop mutation identified in the PflK2 and PFTKL2 KO  
 677 clones which is absent in the 3D7 reference parasite line.

678

679

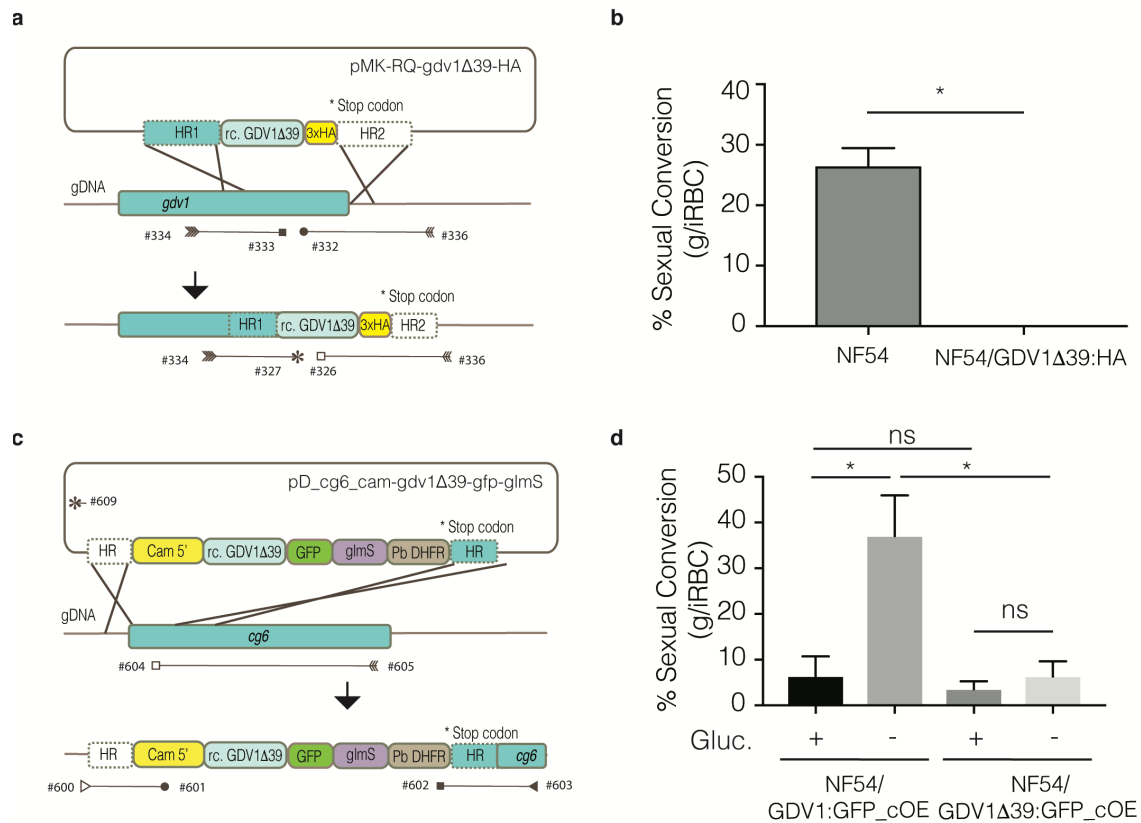

680

681 **Figure 3. Quantification of gametocyte production in *GDV1Δ39* mutant parasite lines.**

682 A) Illustration of the strategy used to generate the 3xHA-tagged *GDV1Δ39* mutant line

683 (NF54/*GDV1Δ39*:HA) as well as the primers used to confirm integration

684 (Supplementary Table 2); The *pMK-RQ-gdv1Δ39-HA* donor plasmid contains a

685 recodonized version of the *gdv1Δ39* mutant and a 3xHA tag, flanked by homology

686 regions. B) Comparison of sexual conversion rates between NF54 and

687 NF54/*GDV1Δ39*:HA parasite lines. Each column represents the mean of duplicate

688 (NF54) and triplicate (NF54/*GDV1Δ39*:HA) microscope counts, each of at least 500

689 cells, analysed using paired t test,  $\pm$  SD, (\*,  $p < 0.05$ ; NF54 versus NF54/GDV1 $\Delta$ 39:HA,  
690  $P = 0.0489$ ). C) Schematic of the strategy used to make the NF54/GDV1 $\Delta$ 39:GFP\_cOE  
691 overexpressing line as well as the primers used to verify integration of the transgene  
692 cassette into the *cg6* (*gfp3*) locus (Supplementary Table 2). The *pD\_cg6\_cam-*  
693 *gdv1 $\Delta$ 39-gfp-glmS* donor plasmid contains a recodonized version of the *gdv1 $\Delta$ 39*  
694 mutant followed by the in-frame *gfp* sequence and the *glmS* ribozyme element,  
695 flanked by homology regions. D) Comparison of sexual conversion rates between  
696 NF54/GDV1:GFP\_cOE and NF54/GDV1 $\Delta$ 39:GFP\_cOE parasite lines in the presence  
697 (prevents sexual conversion) or absence of glucosamine (induces sexual  
698 conversion). Each column represents the mean of triplicate counts of at least 500  
699 cells, analysed using paired t test,  $\pm$  SD, (\*,  $p < 0.05$ ; ns, not significant,  $p \geq 0.05$ ;  
700 NF54/GDV1:GFP\_cOE non-induced versus induced,  $P = 0.0094$ ; non-induced  
701 NF54/GDV1:GFP\_cOE versus NF54/GDV1 $\Delta$ 39:GFP\_cOE,  $P = 0.2276$ ;  
702 NF54/GDV1 $\Delta$ 39:GFP\_cOE non-induced versus induced,  $P = 0.4038$ ; induced  
703 NF54/GDV1:GFP\_cOE versus NF54/GDV1 $\Delta$ 39:GFP\_cOE,  $P = 0.0281$ ).  
704

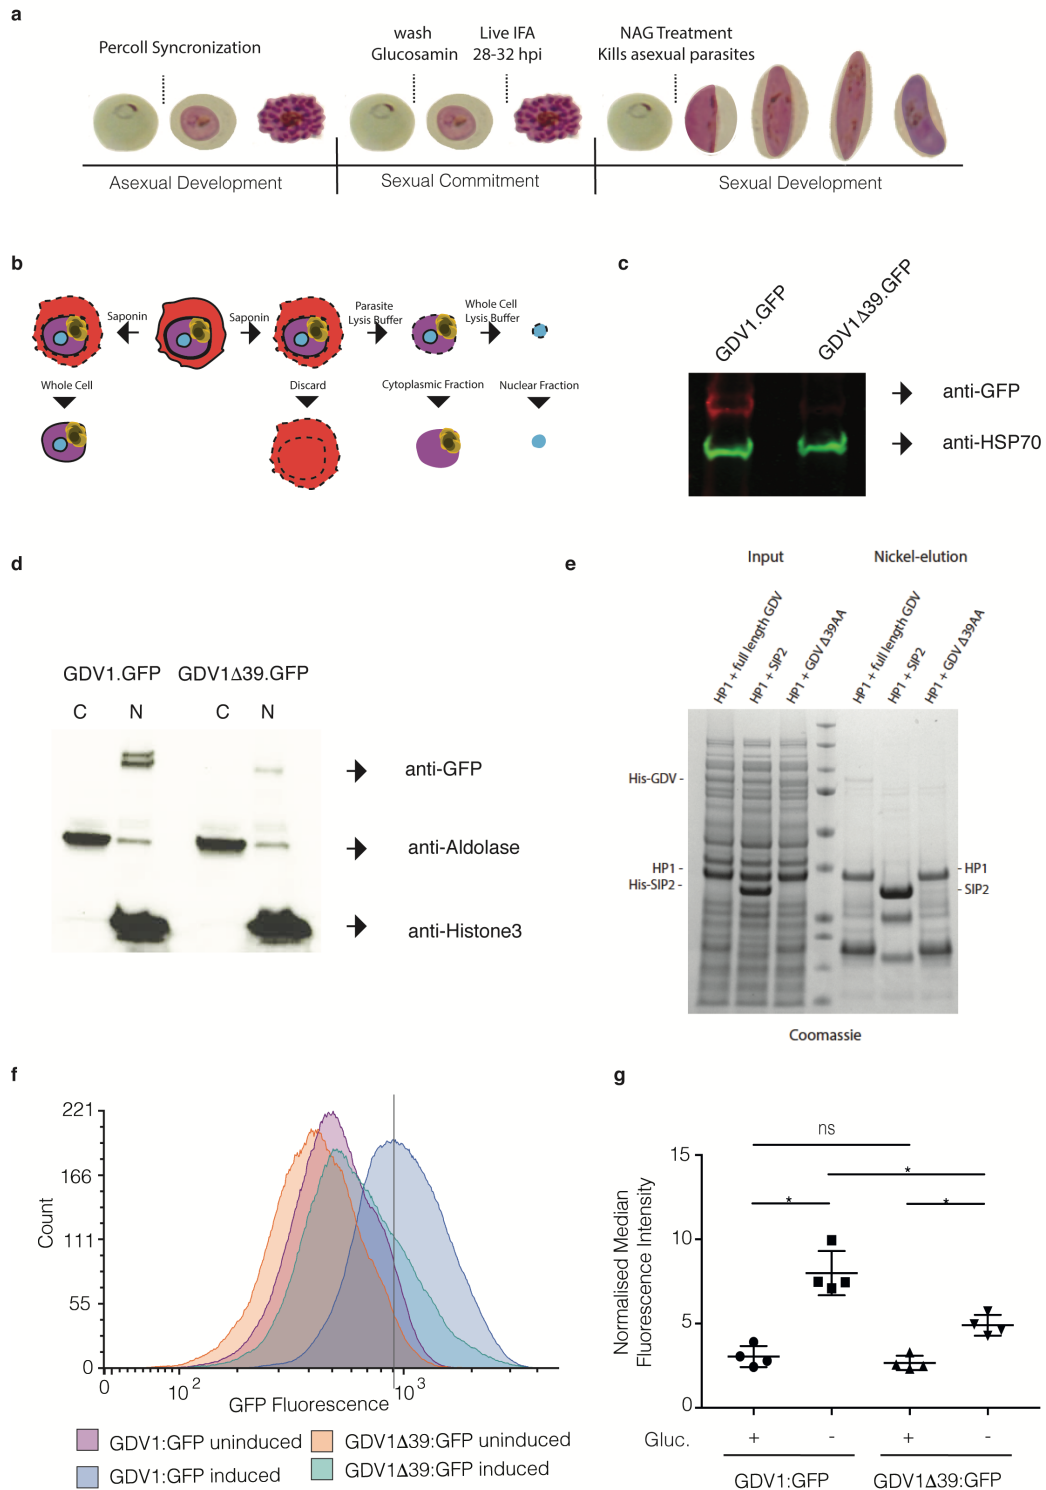

705

706 **Figure 4. GDV1Δ39 expression, localization and interaction with HP1. A)**

707 Representation of the protocol used to collect the samples used to characterize

708 expression and localization of GDV1Δ39::GFP. B) Illustration of the subcellular

709 fractionation workflow. C) Western blot showing the levels of GDV1::GFP expression

710 in NF54/GDV1:GFP\_cOE and NF54/GDV1 $\Delta$ 39:GFP\_cOE parasites grown in the  
711 absence of glucosamine (induces expression); GDV1:GFP/ GDV1 $\Delta$ 39:GFP  
712 expression is detected using an anti-GFP antibody while anti-HSP70 antibodies have  
713 been used as controls. D) Western blot showing GDV1:GFP expression levels in the  
714 cytoplasmic and nuclear fraction in NF54/GDV1:GFP\_cOE and  
715 NF54/GDV1 $\Delta$ 39:GFP\_cOE parasites cultured in the absence of glucosamine  
716 (induces expression). E) Strep-HP1 co-purifies with both HIS-GDV1 and HIS-  
717 GDV1 $\Delta$ 39 but not with the HIS-SIP2 control. Coomassie-stained SDS-polyacrylamide  
718 gel from pull down experiment with HIS-GDV1/Strep-HP1 and HIS-SIP2/Strep-HP1.  
719 Lane 4: protein size standard. F) Representative normalised flow cytometry  
720 histograms quantifying GDV1:GFP fluorescence for each parasite line. The  
721 experiment was repeated 4 times with similar results. Dotted lines indicate the  
722 position of the peaks for the wild-type NF54/GDV1:GFP\_cOE line. G) Quantification  
723 of the median fluorescence intensity of GDV1:GFP in induced or uninduced  
724 NF54/GDV1:GFP\_cOE and NF54/GDV1 $\Delta$ 39:GFP\_cOE parasite lines, normalised to  
725 uninfected parasites from each experiment,  $\pm$  SD, n = 4. (\*,  $p < 0.05$ ; ns, not significant,  
726  $p \geq 0.05$ ; NF54/GDV1:GFP\_cOE uninduced vs induced,  $p = 0.0227$ ;  
727 NF54/GDV1 $\Delta$ 39:GFP\_cOE uninduced vs induced,  $p = 0.0318$ ; NF54/GDV1:GFP\_cOE  
728 induced vs NF54/GDV1 $\Delta$ 39:GFP\_cOE induced  $p = 0.0227$ ; NF54/GDV1:GFP\_cOE  
729 uninduced vs NF54/GDV1 $\Delta$ 39:GFP\_cOE uninduced,  $p = 0.1235$ ); Statistical analysis  
730 was performed using Holm-Sidak corrected multiple comparison analysis of variance  
731 (ANOVA).

732

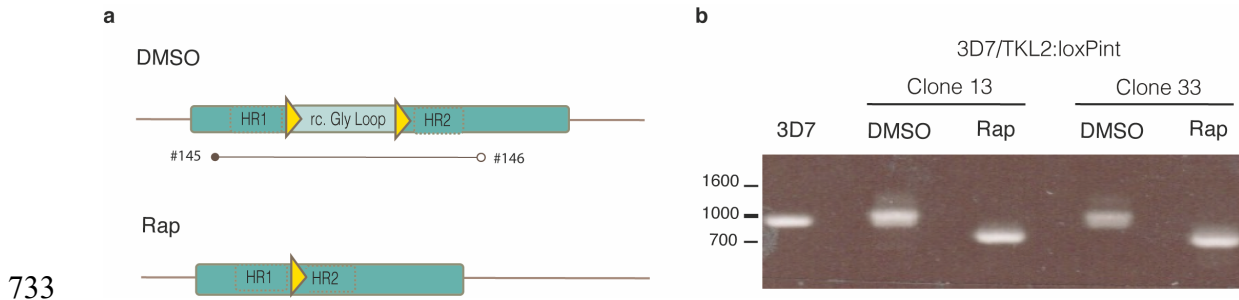

733

734 **Supplementary Figure 1. Confirmation of *tkI2-loxPint* cassette integration into the**

735 ***Plasmodium falciparum* 3D7 line and the efficiency of DiCre mediated excision. A)**

736 **Representation of the primer pairs used to test correct integration of *tkI2-loxPint***

737 **cassette and efficient rapamycin mediated excision. B) PCR analysis shows correct**

738 **integration of *tkI2-loxPint* cassette and near complete excision of TKL2:LoxPint in two**

739 **different clones from the same transfection (clone 13 and 33) after rapamycin**

740 **treatment. The sequences of the primers used are in Supplementary Table 2.**

741

742

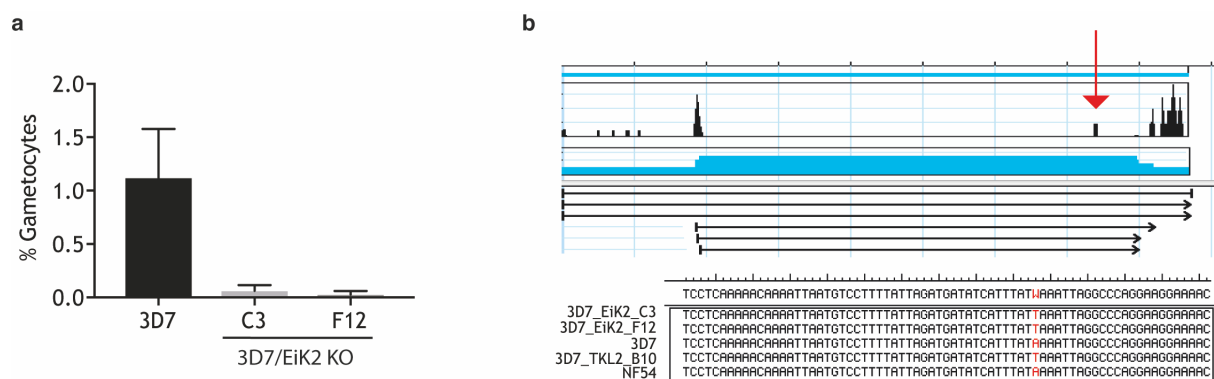

743

744 **Supplementary Figure 2. PfkI2 kinase KO parasites fail to produce gametocytes.**

745 **A) Comparison of gametocytemia upon sexual induction between the 3D7 WT line**

746 **(n=4) and two PfkI2 kinase KO clones (n=2 for each clone, both from the same**

747 **transfection). Parasite line and clones measured in at least two biological experiments**

748 **with single replicates. Each column represents the mean number of gametocytes in**

749 **at least 500 cells. B) Representation of GDV1 sequences of the NF54, 3D7, PfkI2**

750 **and TKL2 parasite lines and the identified point mutation in the PfkI2 and PfkTKL2**

751 **KO clones (red arrow) which is absent in the 3D7 and NF54 reference parasite lines.**

752

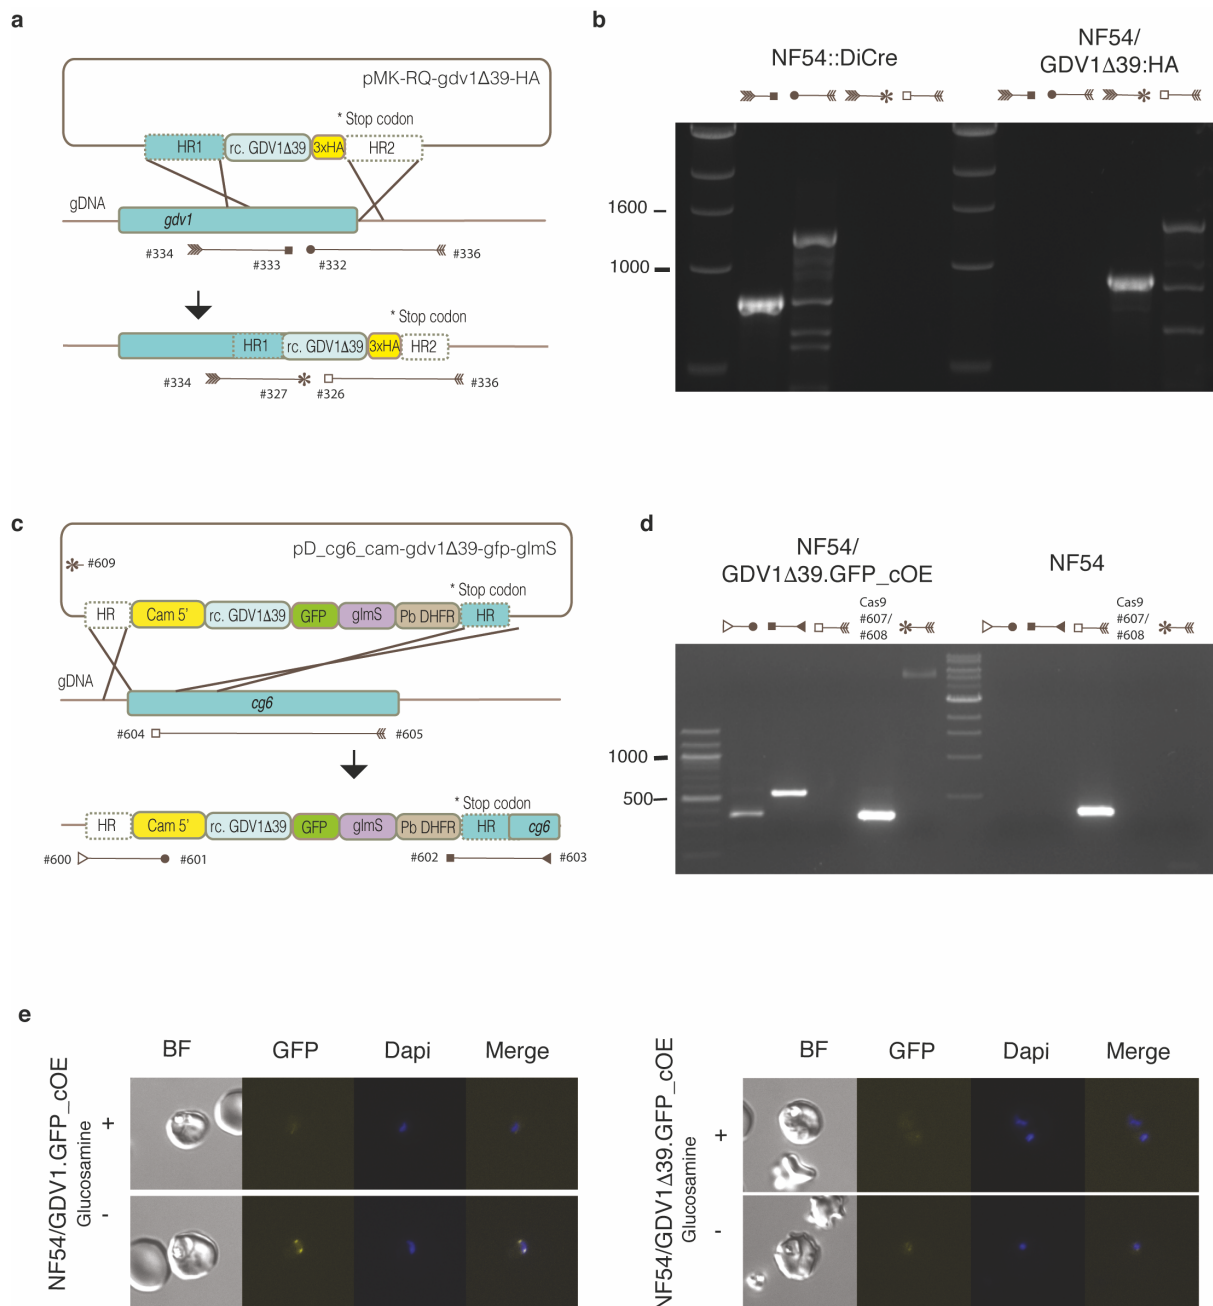

753

754 Supplementary Figure 3. Generation of the NF54/GDV1Δ39:HA and

755 NF54/GDV1Δ39:GFP\_cOE *Plasmodium falciparum* lines. A) Illustration of the

756 strategy used to generate the 3xHA-tagged GDV1Δ39 mutant line

757 (NF54/GDV1Δ39:HA) as well as the primers used to confirm donor sequence

758 integration. B) PCR analysis of integration of the *gdv1*Δ39:ha construct into the *gdv1*

759 locus in the NF54 *P. falciparum* parasite line. C) Schematic of the strategy used to

760 generate the NF54/GDV1Δ39:GFP\_cOE overexpressing line as well as the primers

761 used to verify integration of the transgene cassette into the *cg6 (gfp3)* locus. The  
762 pGDV1Δ39:GFP\_cOE donor plasmid contains a 5' Cam sequence followed by a  
763 recodonized version of the *gdv1Δ39* mutant in-frame with *gfp* sequence, the *gImS*  
764 ribozyme element and *Plasmodium berghei* dihydrofolate reductase (PfDHFR),  
765 flanked by two homology regions. D) PCR analysis of *gdv1Δ39-gfp-gImS* cassette  
766 integration in the *cg6* locus in the NF54 *P. falciparum* parasite line and the presence  
767 of the CRISPR/Cas9/Suicide plasmid. E) Quantification of GFP expression in the  
768 GDV1:GFP and GDV1Δ39:GFP lines cultured in in the presence (prevents GDV1  
769 expression) or absence of glucosamine (induces GDV1 overexpression).  
770



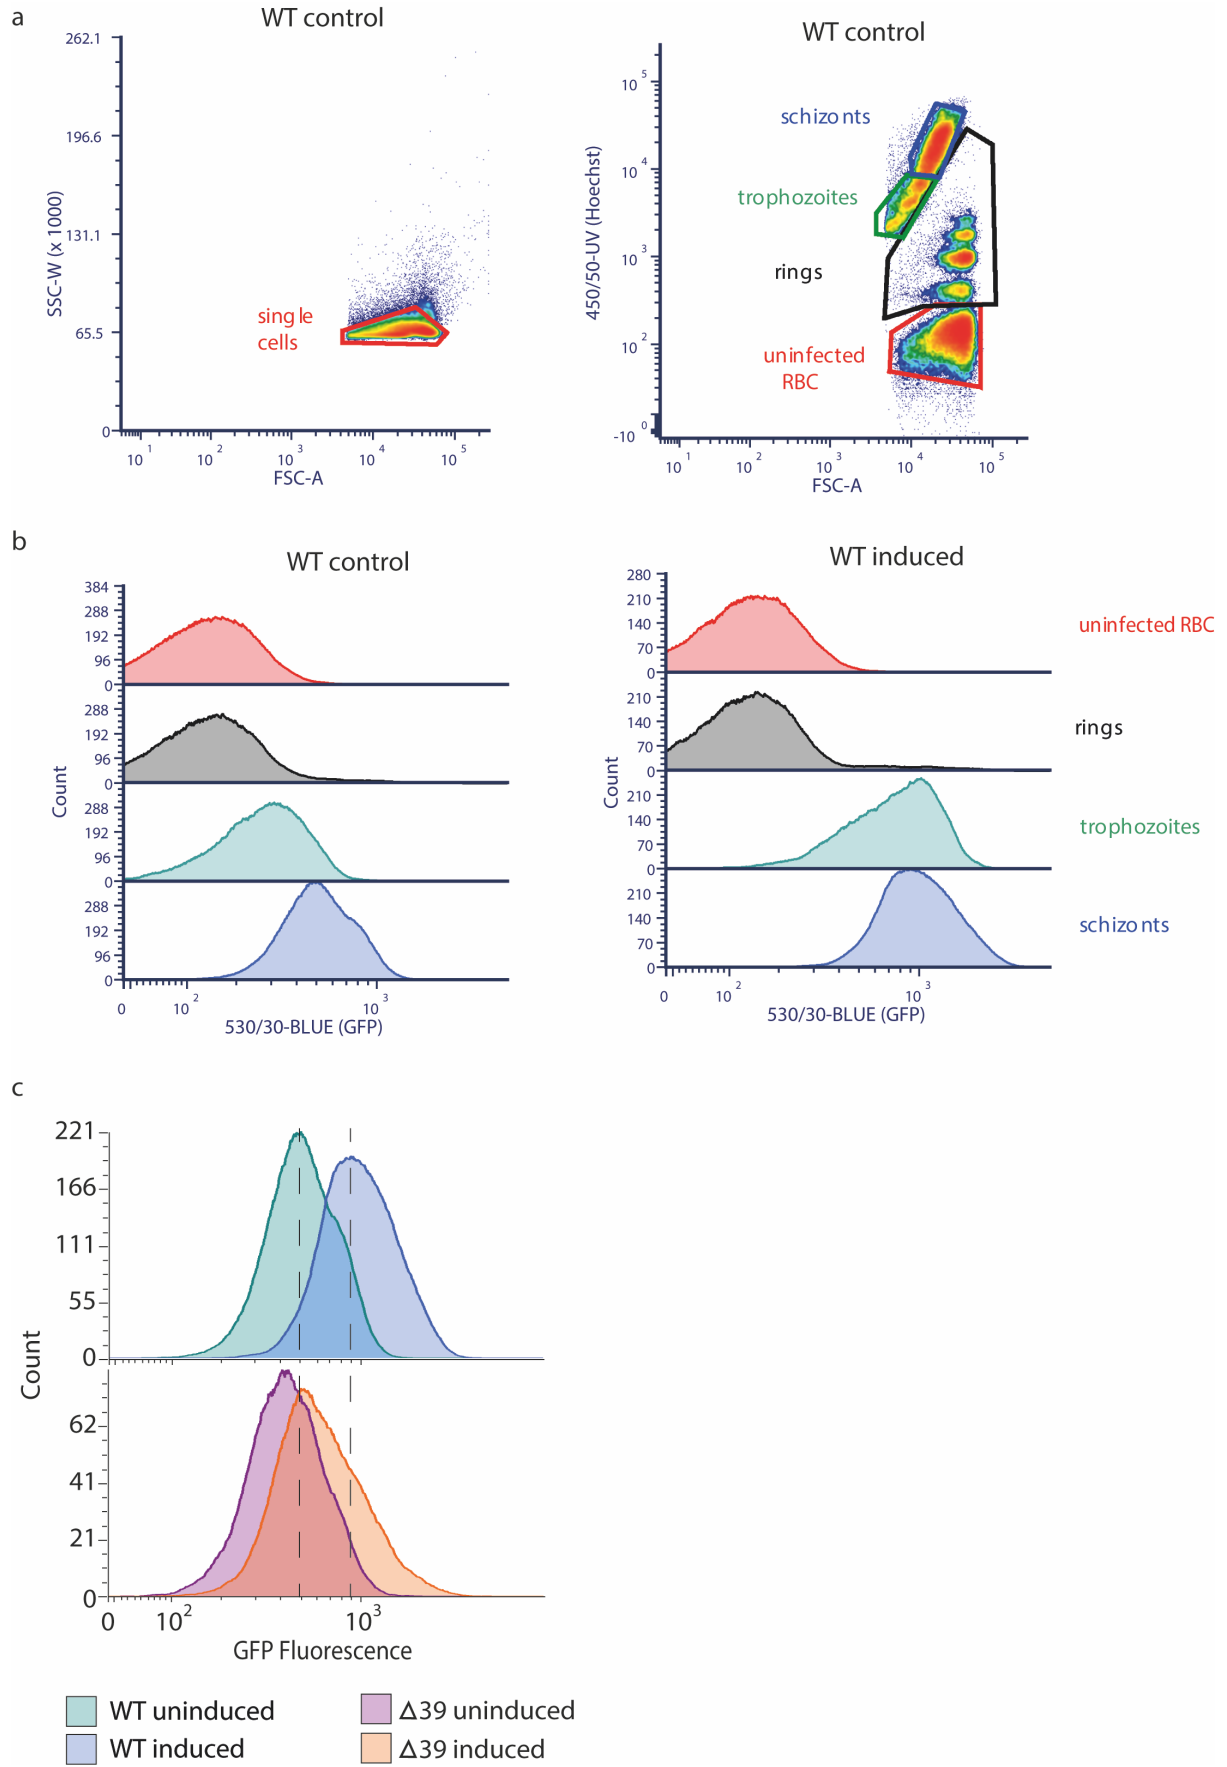

771

772 **Supplementary Figure 4.** A) Gating strategy for flow cytometry experiments. B) Flow  
 773 cytometry histograms quantifying GFP fluorescence in uninfected RBC and RBC  
 774 infected with ring stage parasites, trophozoites and schizonts. Stacked plots are  
 775 shown for both GDV1:GFP uninduced and induced parasites. C) Normalised flow  
 776 cytometry histograms quantifying GFP fluorescence for each line. The experiment  
 777 was repeated 4 times with similar results. Dotted lines indicate the position of the  
 778 peaks for the wild-type NF54/GDV1:GFP\_cOE line.

779

780

781 **Supplementary Table 1.** Comparison of gene expression, based on RNAseq data, of  
 782 samples from 3D7 WT and PflK2 C3 and F12 kinase KO clones.

783 Log2 fold changes of induced vs. non-induced parental (3D7) and the 2 *gdv1* mutant  
 784 parasite clones from the PflK2 KO clones C3 and F12.

785

786

787 **Supplementary Table 2.** Primers, fragment and guide RNA sequences used to  
 788 generate and confirm integration and rapamycin-induced excision of *pMK-RQ-tkl2-*

789 *loxPint*, *pMK-RQ-gdv1Δ39-HA* and *pD\_cg6\_cam-gdv1Δ39-gfp-glmS*.

| Primer              | Sequence                                                                                                                                                                                                                                                                                                                                                                                                                                                                                                                                                                                                                                                                                                                        |
|---------------------|---------------------------------------------------------------------------------------------------------------------------------------------------------------------------------------------------------------------------------------------------------------------------------------------------------------------------------------------------------------------------------------------------------------------------------------------------------------------------------------------------------------------------------------------------------------------------------------------------------------------------------------------------------------------------------------------------------------------------------|
| #145                | AGCAAAAGTCTTAAGCTCATGGAGG                                                                                                                                                                                                                                                                                                                                                                                                                                                                                                                                                                                                                                                                                                       |
| #146                | ATGAATAGCAGGAGATTTAGATACC                                                                                                                                                                                                                                                                                                                                                                                                                                                                                                                                                                                                                                                                                                       |
| pDC2_TKL2_gRNA_FOR  | attgATAATAGAATTGCAAAAGGA                                                                                                                                                                                                                                                                                                                                                                                                                                                                                                                                                                                                                                                                                                        |
| pDC2_TKL2_gRNA_REV  | aaacTCCTTTTGCAATTCTATTAT                                                                                                                                                                                                                                                                                                                                                                                                                                                                                                                                                                                                                                                                                                        |
| <i>tkl2-loxPint</i> | CTGGAAAGCGGGCAGTGAAAGGAAGGCCCATGAGGCC<br>CAGATAATAGGGGTCTGCATATCCTGGGGTTCCTCCTGT<br>CAAGTTAAACACATTATTGTTGTTTCATGTAAACAAAGGAA<br>AGCCCAAATCACCAAGCTTAGCATTAAATTGATCATCTA<br>TAAAAATGTTTGCAGATTTTAAATCTCTATGATATACAATA<br>GGAGAAGATGTATGTAAATAACATAAGACATTAATTATTT<br>GACTAATATATTTATTCTTATATTAATGATAAAAATAGA<br>GGTGTGTTATTATCAAATGAATTTTGTTGAAATGGAGAAT<br>ATTTTGAATTATTGAAATATGGGAAAATGTTTTGTTTATAA<br>AACGTTGAAGTATAATAATTTGTAGAAGAACAAGAAGAA<br>GAACTTTTTTTTTTACGTAGATAATTTTCATAACAACCTTATA<br>TTATAATAACTTAATTCTGGATTTTCTTTGTTTTTTGAATTAT<br>AATAATAATAATGATTAATAATAATGTTCTTAAATCACCT<br>AGATTAACATATTCATATATTAATAAAAATTATTTTTATTC<br>GTAGCATAACCTAATAAAGATCTACAAAAAAGAATAAAAA<br>TAAAAAATAAAAAATAAAAAAATAAACATATATATATATA |

|                          |                                                                                                                                                                                                                                                                                                                                                                                                                                                                                                                                                                                                                                                                                                                                                                                                                                                                                                                                                                                                                                                                                                        |
|--------------------------|--------------------------------------------------------------------------------------------------------------------------------------------------------------------------------------------------------------------------------------------------------------------------------------------------------------------------------------------------------------------------------------------------------------------------------------------------------------------------------------------------------------------------------------------------------------------------------------------------------------------------------------------------------------------------------------------------------------------------------------------------------------------------------------------------------------------------------------------------------------------------------------------------------------------------------------------------------------------------------------------------------------------------------------------------------------------------------------------------------|
|                          | TACATATATATACATATATATATCCATATATACATATTAATT<br>CATTTCATAACTTCGTATAATGTATGCTATACGAAGTTAT<br>AACTTGCATATATTTTATACATATTCTGTATTACAAGATGTT<br>GTTGTGTCTGTATCTGGACATGATAATGATTTTCGTTTTCG<br>AAACCGTTGTTTTCGTTCTTTTTCAaGACCTTAATGGCAAC<br>GTTGATGCAGTTCTTCAAACaCCTTTGTAACAGTACCG<br>TTACCACCCTTGGCGATTCCATAAAAGAATATAAAATATAT<br>AAATATATATATATACATATATAATAACTTCGTATAATGT<br>ATGCTATACGAAGTTATTGTATATTATTTTTTTTATTTACTAT<br>TATATTCTGAAAAATTATTTGTTGCTTCTACTAAATCATTAA<br>AATCATATTTATTAGATAAAATCTTTAAAGGAATAAATATA<br>TTCTCTTCACGTTTTTCTATTCTGTTAAATTCCATACCTTCA<br>TTTGGTGTCTTGTATTCGACATTTTCTCTATTTATTTTCATCT<br>TCATAAATCTCATTTCCTTCATCATAATTTAAAATGTAT<br>TTATCATAAGTATCATATGTTTCTATATATACTACCTTTCTA<br>TTCTTATGTCTATTCGAATTCTTTCTATTAATATCGTTGTTA<br>TTTTTGATATGATTATTATTTATATGGTTATTGCTCACATGA<br>ATATTATTAATATGGTTATTGCTCACATGGATATTATTAATA<br>TGGTCATtGKTCACATGGATATTTTTAATATGtCTATTATTC<br>ATATAATTGTTTATAtATTTATTATTAATATGTTTATCATTCA<br>CATGATGATTATTAATATTGAAATTATGGTTATTATTTATAT<br>CAATCTCTTTCTTCTTTTCATCCCCTTCC                                                                                |
| #268 (GDV1_TAA_GIB FOR1) | TAG GCC CAG GAA GGA AAA CAA AAA CGT CAG CAT<br>TCA TCA TC                                                                                                                                                                                                                                                                                                                                                                                                                                                                                                                                                                                                                                                                                                                                                                                                                                                                                                                                                                                                                                              |
| #269 (GDV1_TAA_GIB REV1) | AGT GAA AGG AAG GCC CAT GAG GCC CAG TGA ACA<br>TGC TAT ATT CTT ATG TAT GTA CC                                                                                                                                                                                                                                                                                                                                                                                                                                                                                                                                                                                                                                                                                                                                                                                                                                                                                                                                                                                                                          |
| #383 (GDV1_TAA_GIB FOR2) | TGTTCCCTAATATAAACTCAGATATAAATGTTGATACC                                                                                                                                                                                                                                                                                                                                                                                                                                                                                                                                                                                                                                                                                                                                                                                                                                                                                                                                                                                                                                                                 |
| #384 (GDV1_TAA_GIB REV2) | GTTCTTCTCCTTTACTCATGCGGCCATAGATAATATCGTC<br>CAGCAGCAGAAC                                                                                                                                                                                                                                                                                                                                                                                                                                                                                                                                                                                                                                                                                                                                                                                                                                                                                                                                                                                                                                               |
| pDC2_GDV1Δ39_gRNA1_FOR   | ATTGCTACAAATTTTGTAATTAAT                                                                                                                                                                                                                                                                                                                                                                                                                                                                                                                                                                                                                                                                                                                                                                                                                                                                                                                                                                                                                                                                               |
| pDC2_GDV1Δ39_gRNA1_REV   | AAACATTAATTACAAAATTTGTAG                                                                                                                                                                                                                                                                                                                                                                                                                                                                                                                                                                                                                                                                                                                                                                                                                                                                                                                                                                                                                                                                               |
| <i>gdv1Δ39-HA</i>        | GATTCCGATGTAATATCTTATAGTTATCATTTCGACCATAC<br>AATCATTTATTGTATTAAGATAAATATAAAAATGTTACAA<br>ATGTTCCCTAATATAAACTCAGATATAAATGTTGATACCATA<br>ACACATCCTGAAACAACAACAACATATCCAATCATTATA<br>AAAATCATAACACTATTATGTTTAAAAAACCTGTGATTCTT<br>ATCTGTTCTTTGAATAATTTACCCTTAAAAAATAATAAAAT<br>ACATGATGATATAATTCTTGACGATTTCTGTTATATGACCT<br>ACATTATTAAACTTTGTATTTTCGTTTTCAATCAAGAAGT<br>ATACGCAACATGCTCAAAGCAATCTGAATAACACCACC<br>AACTTTGTGATTAACCGTATCACCCAGATGAATAATACCA<br>ATCGCCTGCTGAAAAACAAGATTAATGTTCTGCTGCTGG<br>ACGATATTATCTATTACCCATACGATGTTCCAGATTACGC<br>TTATCCGTATGATGTGCCGGATTATGCGTACCCATACGA<br>TGTTCCAGATTACGCTTAAATTAGGCCAGGAAGGAAAA<br>CAAAAACGTCAGCATTTCATCATCTTCTACAAAAGGCTTAT<br>TCTCCATTCTATTATCCAATTCATTATTATATAAAAAGAAAA<br>ATGTACATATAAATAAATAAATGAAAAAAAAAAAAAAAAAGAA<br>AAATAAAAAAAAAAAAAAAAAAAAAAAAAAAAAAAAAAGAAAAA<br>GAAAAAAGAAAAAAGTAAAAAGAAAAAAGAAAAAATTTA<br>TATGTAATATAATTAATAAATTTGTATGCTAATATATGTGTA<br>TAATATGTATCTCATCGTGTACATGTATATAATATATATAT<br>ATTTTGTAGGTAATATTATATCTACTTTTAAACATACATATA<br>TATGTAATATATATATATATATTAATAAAAAATATAAAGG<br>TTTCAAACATATATGTTTGCTTTTATAATTTTAAAAA |

|                           |                                                 |
|---------------------------|-------------------------------------------------|
|                           | TTCTTATCTATGTTGGTACATACATAAGAATATAGCATGTT<br>CA |
| #123                      | AAAGGTGTTTTGAAGAAGTGCATCAACG                    |
| #124                      | TATCTGGACATGATAATGATTTTCG                       |
| #145                      | AGCAAAAGTCTTAAGCTCATGGAGG                       |
| #146                      | ATGAATAGCAGGAGATTTAGATACC                       |
| #147                      | GGAGGGAATGGAACAGTATATAAA                        |
| #148                      | TTTATATACTGTTCCATTCCCTCC                        |
| #332                      | ACAATACTACAAATTTTGTAATTAATCGG                   |
| #333                      | ACAAAATTTGTAGTATTGTTGAGGTTAC                    |
| #334                      | AAGGATATTAATAATCATAGAAAACG                      |
| #336                      | TCAATTAATAATACAGAACAAGTATCC                     |
| #402                      | AAGAGGTAGAGTTCAATTCATCAAACC                     |
| #403                      | ATCTTTAATTTTATTTTGGTCATGC                       |
| #404                      | AAGGCTTTTTCCATTTTCAAGTGTTTCAGG                  |
| #406                      | ACATTGAAGATGGAAGCGTTCAACTAGC                    |
| #600 (CG6 integration rv) | ATTATGGGAAAATAATCCTTAC                          |
| #601 (Cam rv)             | AGAAGCTCAGAGGCATGC                              |
| #602 (CG6 integration fw) | CTTTAATTTTATTTTGGTCATG                          |
| #603 (PbDT 3' For)        | GGGAAGGTGTTGCTCAAATAGTG                         |
| #604 (CG6 WT fw)          | GTTTCATGCTCCTCAACAAAG                           |
| #606 (CG6 WT rv)          | GAACAAATACATAAGAGCGC                            |
| #607 (Armin 73)           | GCTCAATTCCTTATGTCCACAAC                         |
| #608 (Armin 124)          | CATGTTTTGTAATTTATGGGATAGCG                      |
| #609 (Amp ORI seq fw)     | GCGAGGAAGCGGAAGAGC                              |

790

791
